# Supplementary material for: Using halogen⋯halogen interactions or C/N–H⋯Cl hydrogen bonding to direct crystal packing in tetrachlorophthalic acid with N-heterocyclic compounds
Source: Royal Society of Chemistry journal article supplement (doi:10.1039/c4ra15392h), 2014-12-24
Supplement: c4ra15392h1.pdf [file c4ra15392h1.pdf]

## Supporting information for this article:

### IR curves

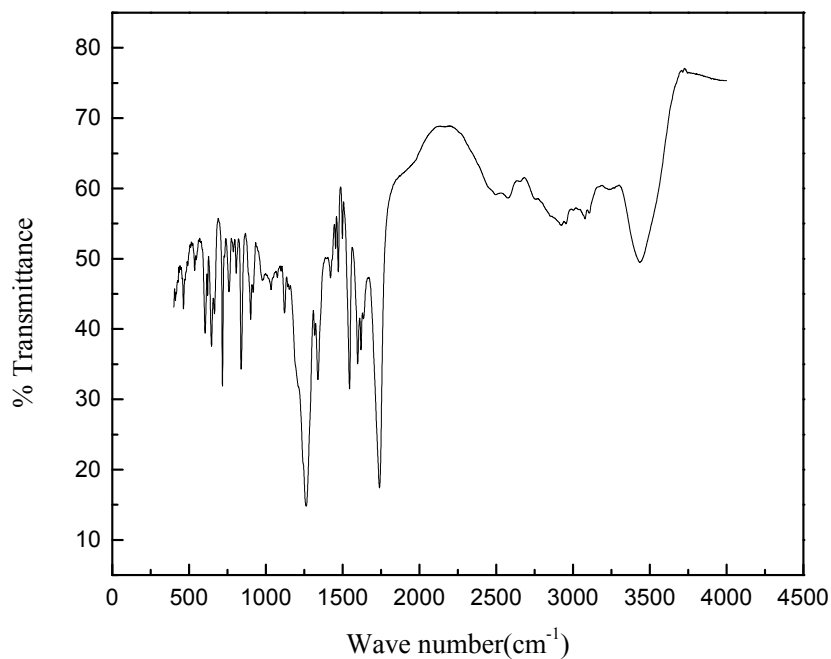

The IR curve of **1**

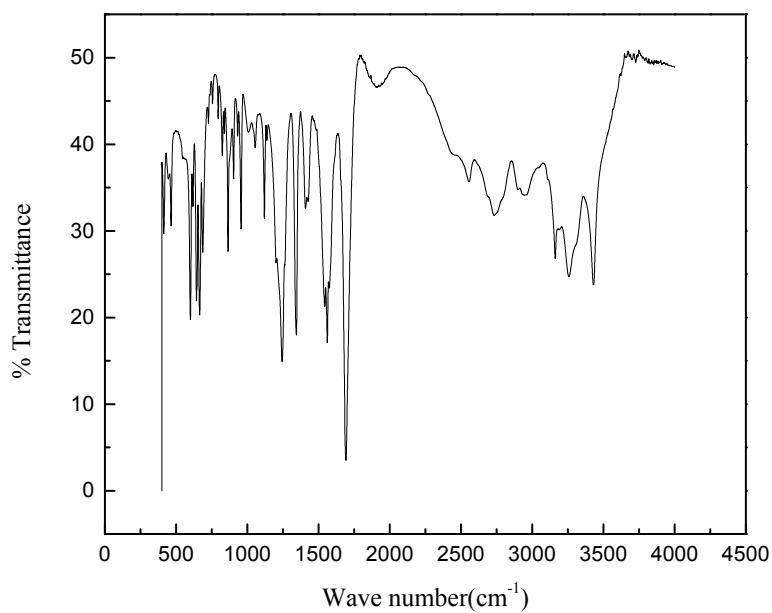

The IR curve of **2**

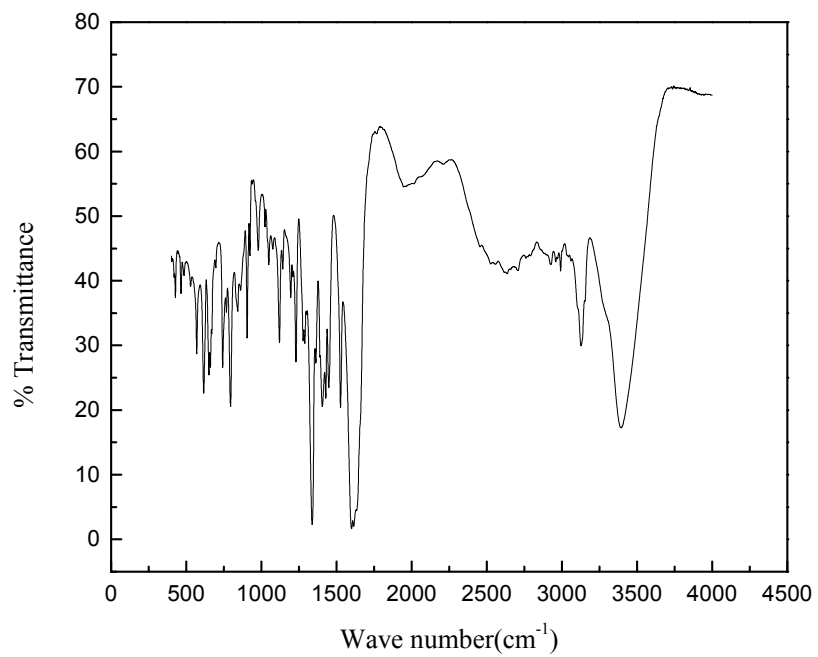

The IR curve of **3**

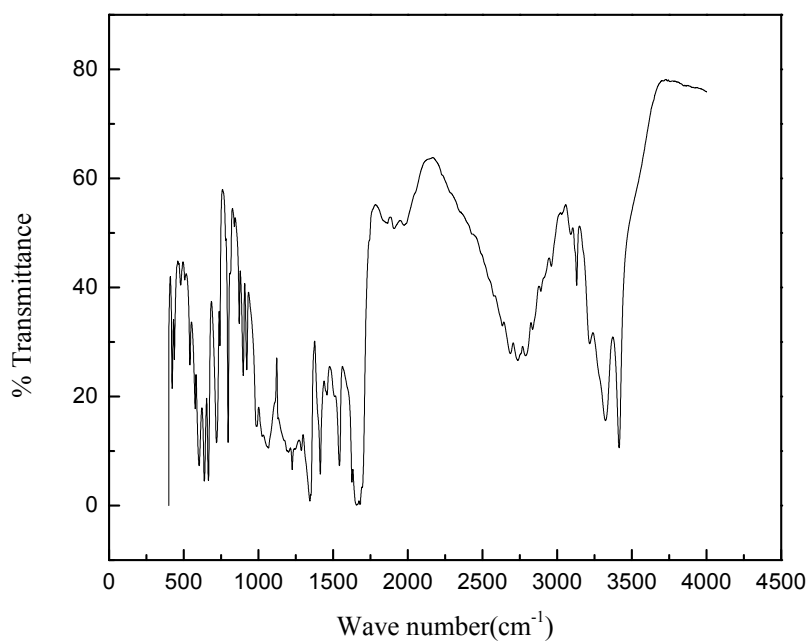

The IR curve of **4**

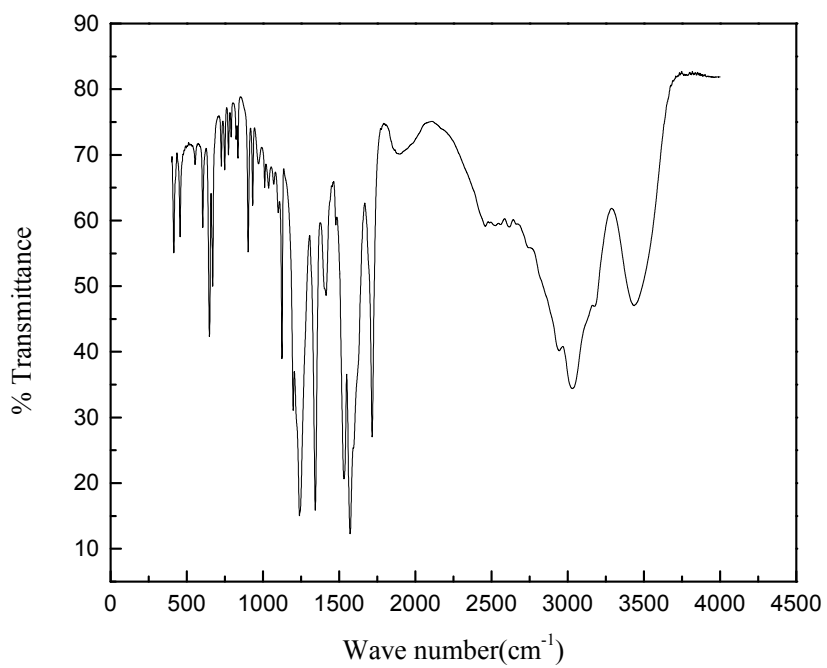

The IR curve of **5**

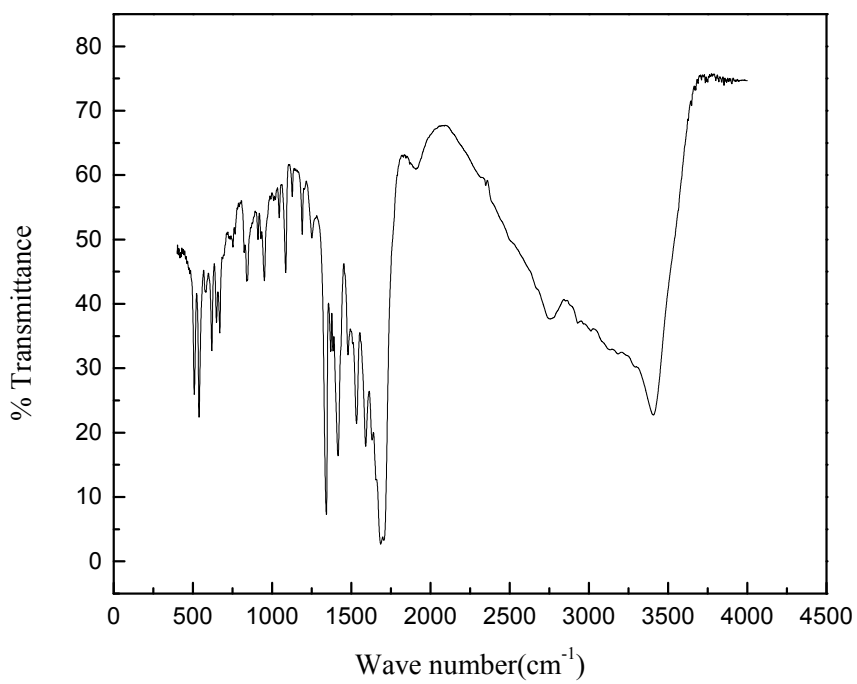

The IR curve of **6**

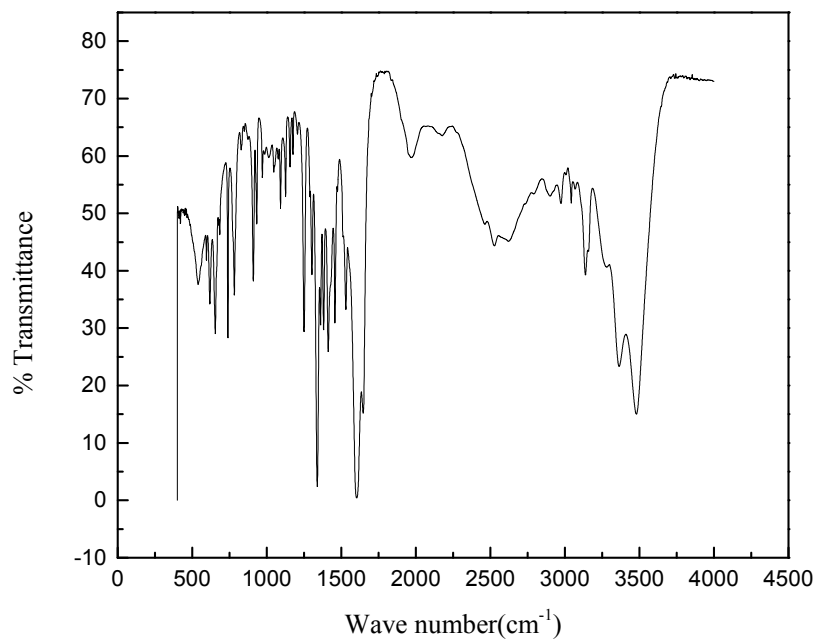

The IR curve of **7**

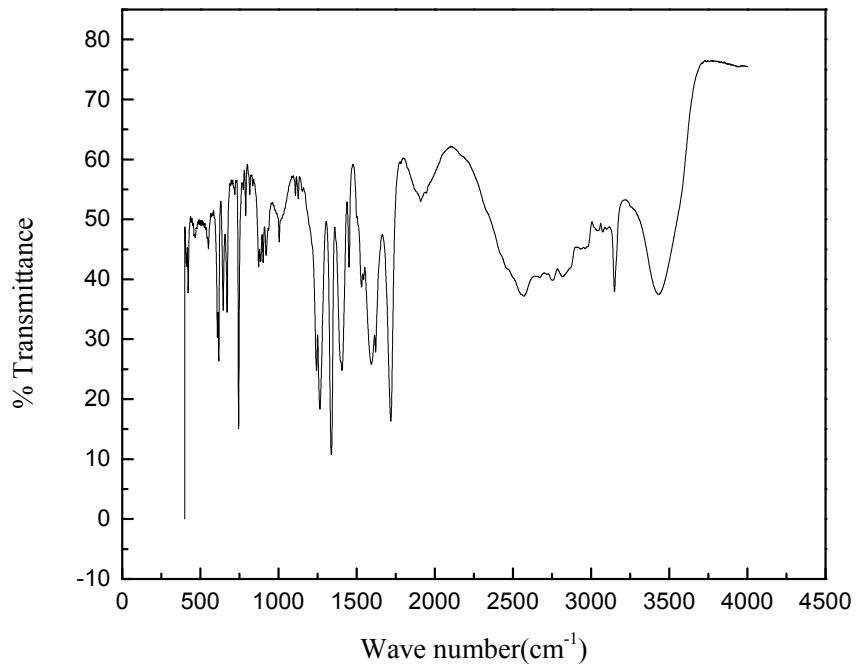

The IR curve of **8**

# The TGA and DSC curves

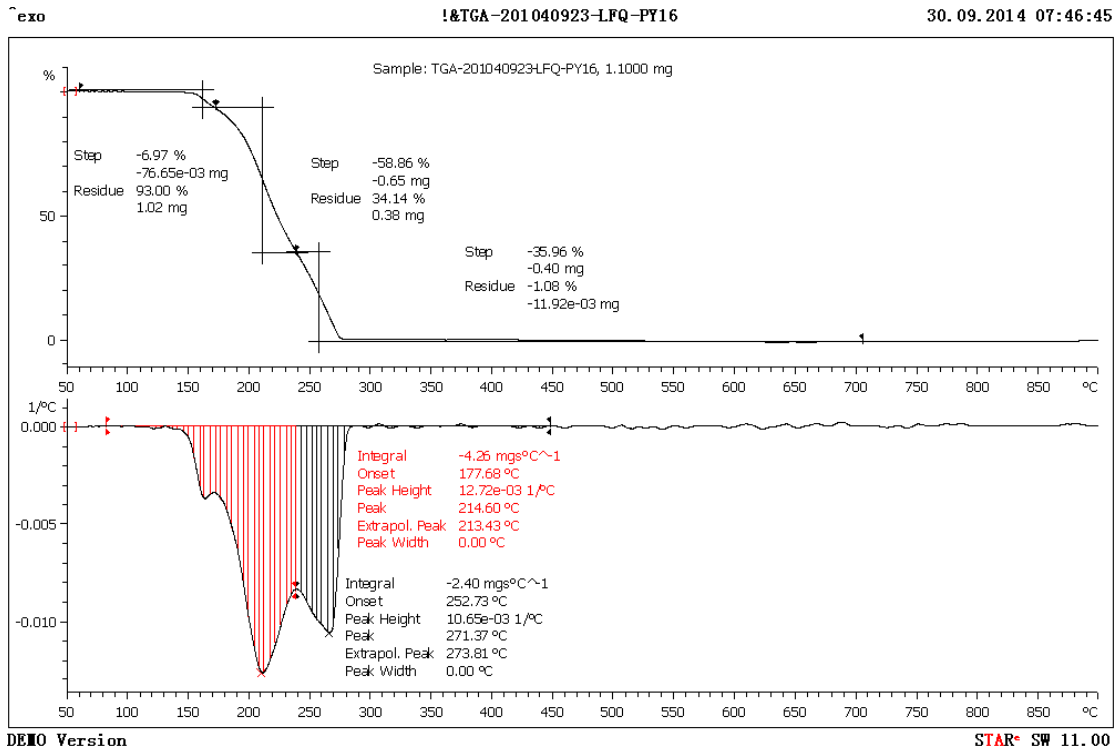

The TGA and DSC curve of 1

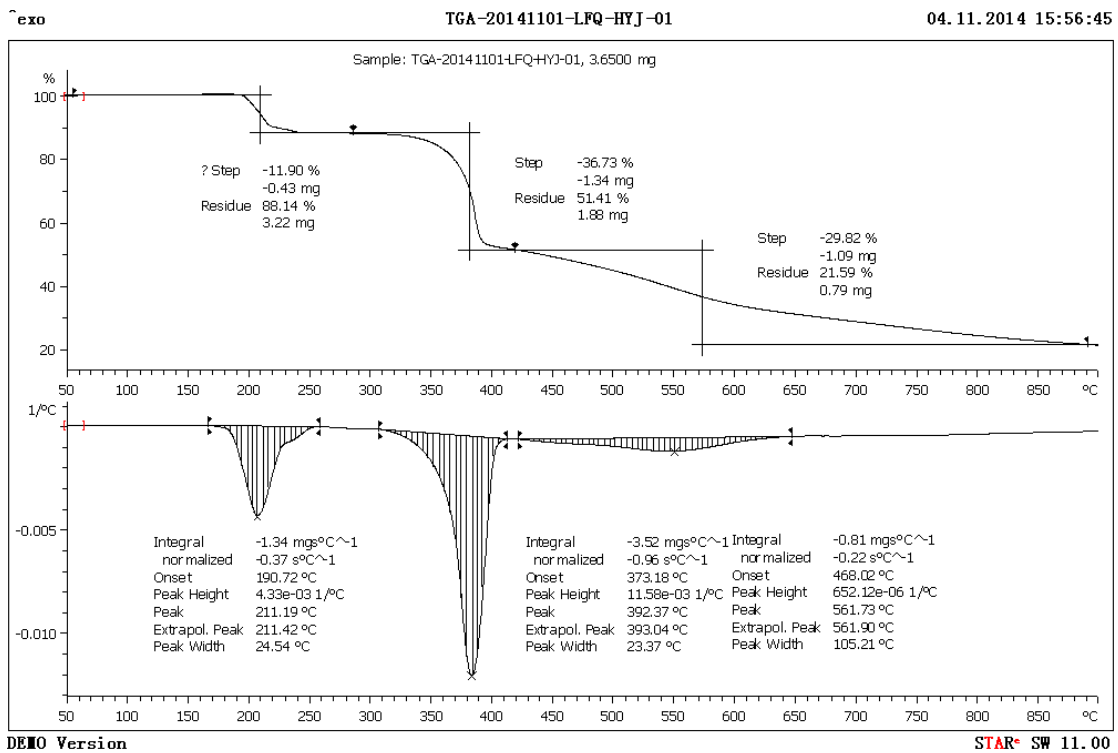

The TGA and DSC curve of 2

exo

TGA-20141101-LFQ-HYJ-02

04.11.2014 15:59:18

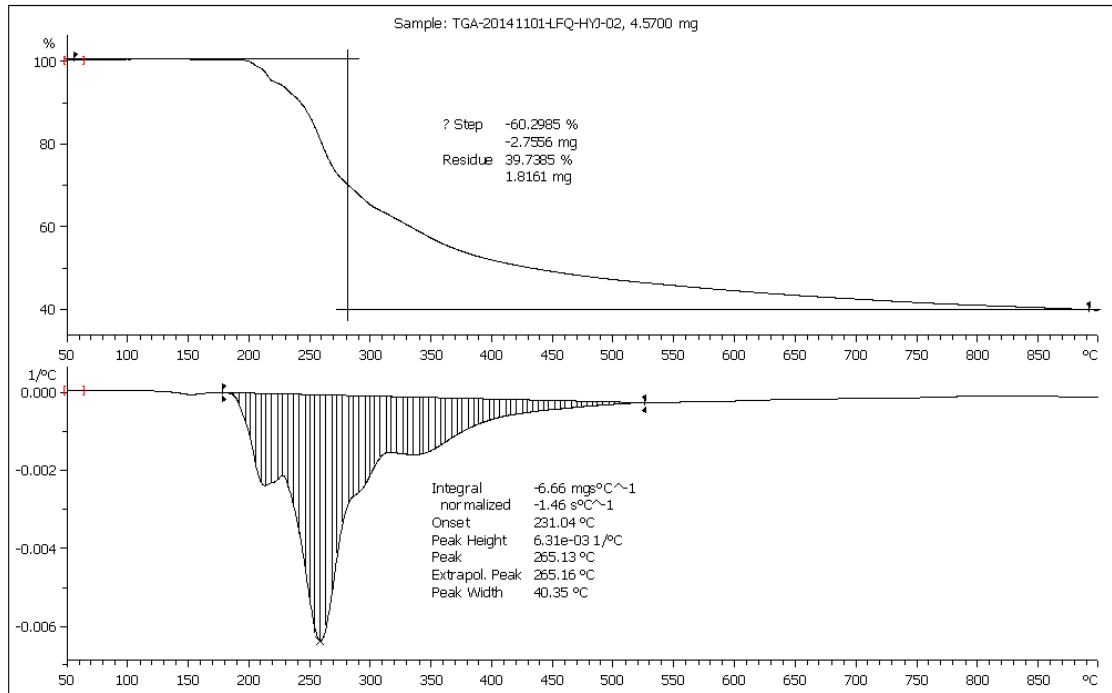

The TGA and DSC curve of 3

exo

TGA-201040923-LFQ-PY15

30.09.2014 07:48:28

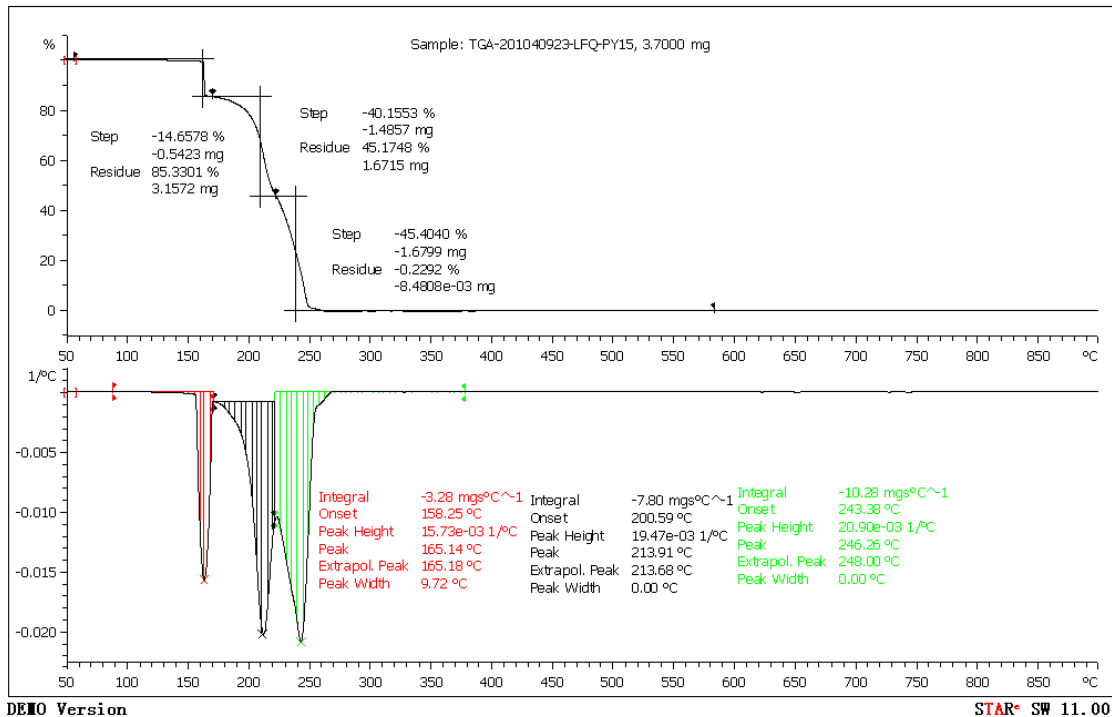

The TGA and DSC curve of 4

exo

TGA-20141101-LFQ-HYJ-03

04.11.2014 16:04:13

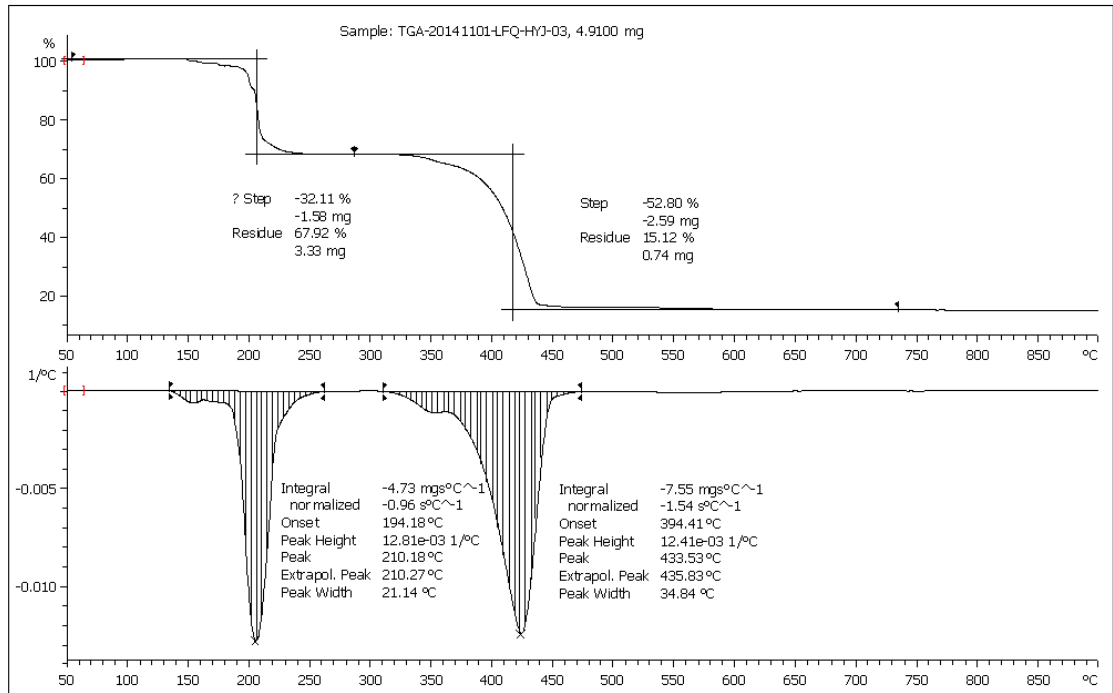

DEMO Version

STAR<sup>®</sup> SW 11.00

The TGA and DSC curve of 5

exo

TGA-20141101-LFQ-HYJ-04

04.11.2014 16:06:41

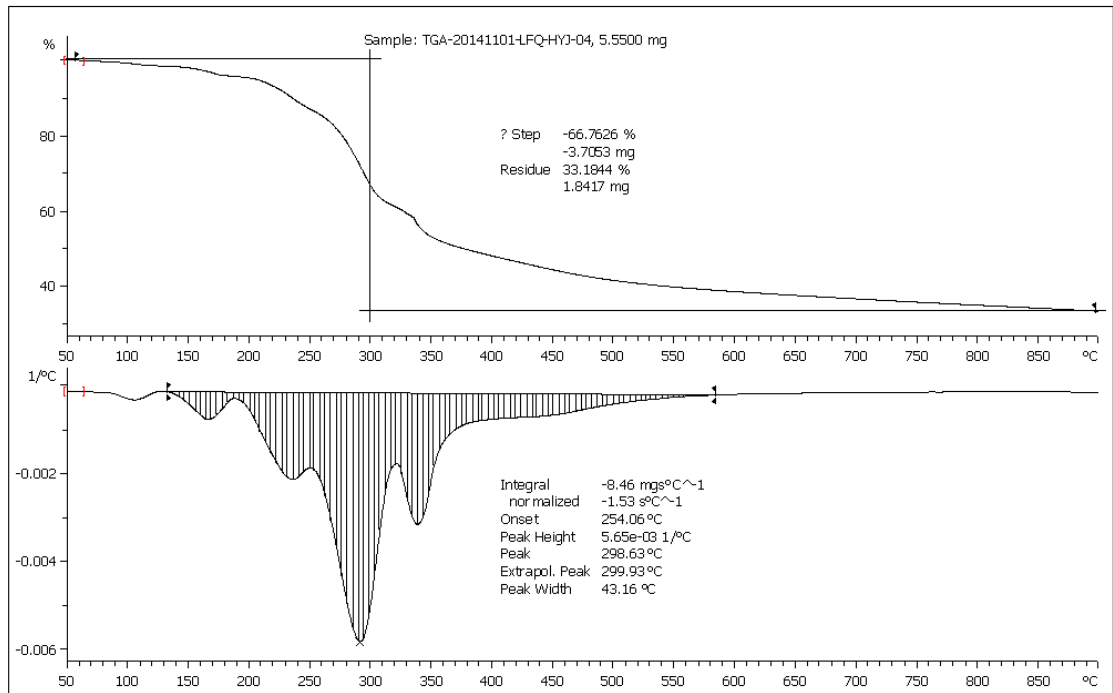

DEMO Version

STAR<sup>®</sup> SW 11.00

The TGA and DSC curve of 6

exo

TGA-20141101-LFQ-HYJ-05

04.11.2014 16:09:02

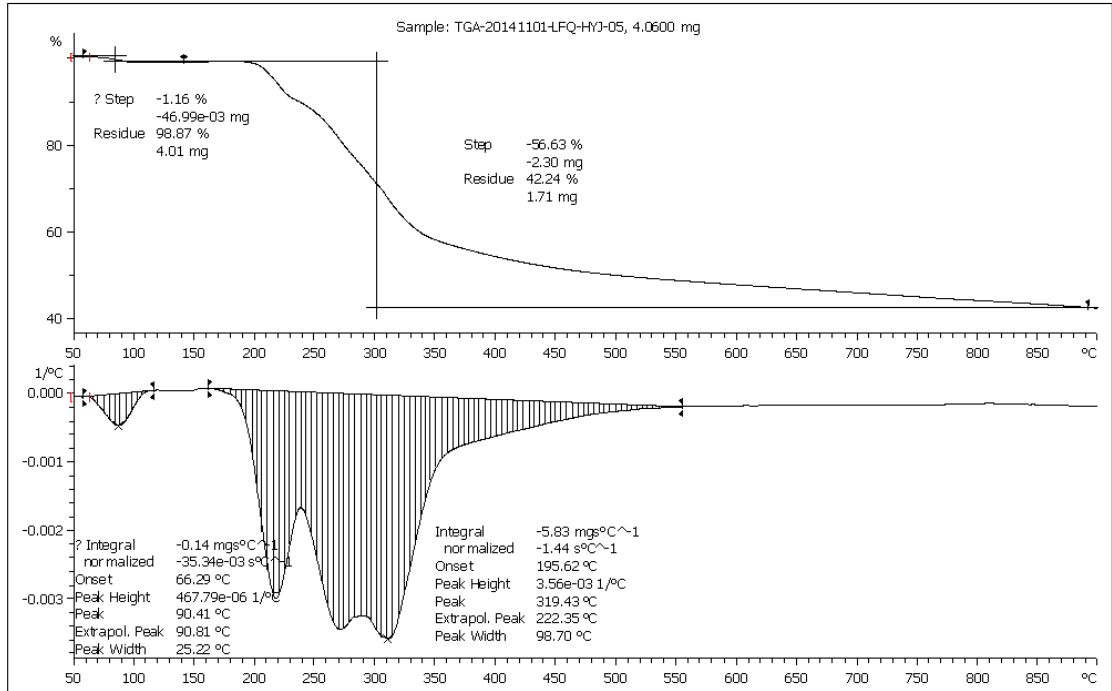

DEMO Version

STAR<sup>®</sup> SW 11.00

The TGA and DSC curve of 7

exo

TGA-20141101-LFQ-HYJ-06

04.11.2014 16:12:01

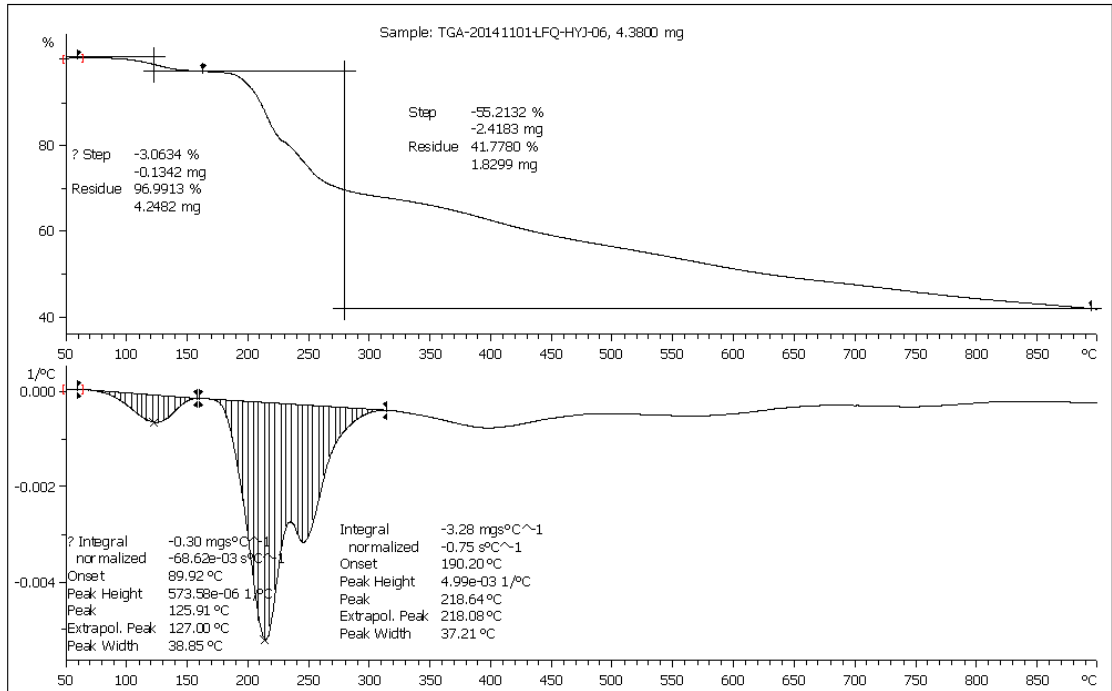

DEMO Version

STAR<sup>®</sup> SW 11.00

The TGA and DSC curve of 8



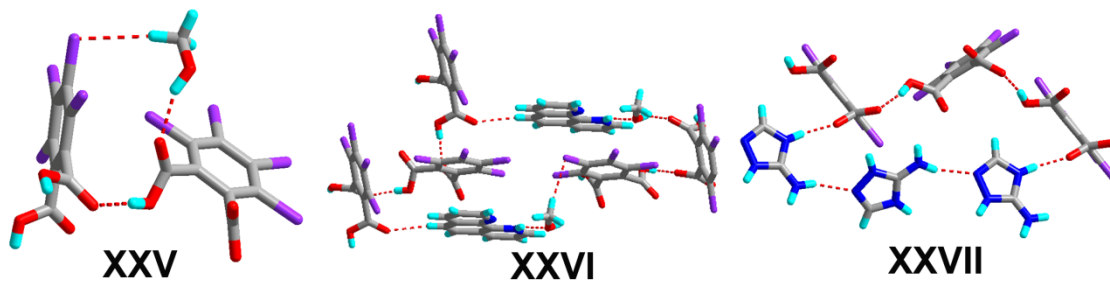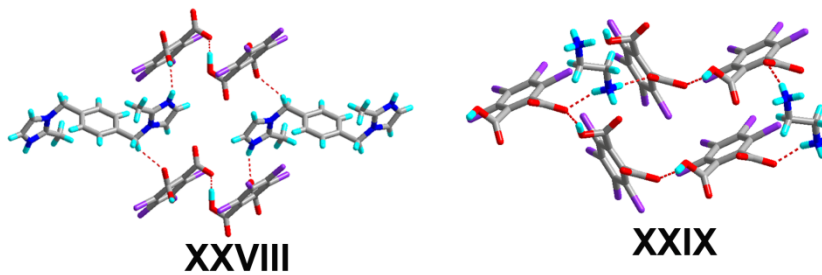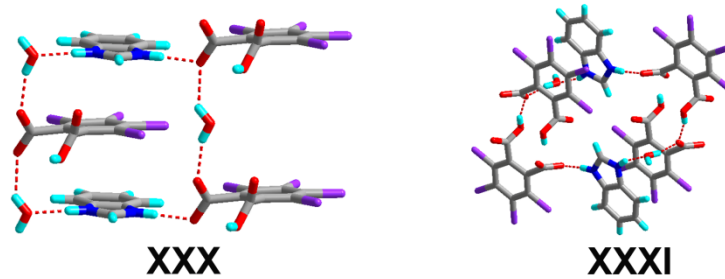

Synthons of complexes 1-8
